# Supplementary material for: All-trans retinoic acid as adjunct to intensive treatment in younger adult patients with acute myeloid leukemia: results of the randomized AMLSG 07-04 study
Source: PubMed Central journal article supplement (PMC5093206; doi:10.1007/s00277-016-2810-z), 2016-10-03

# Supplementary Figure 3: Overall Survival, per-protocol analysis

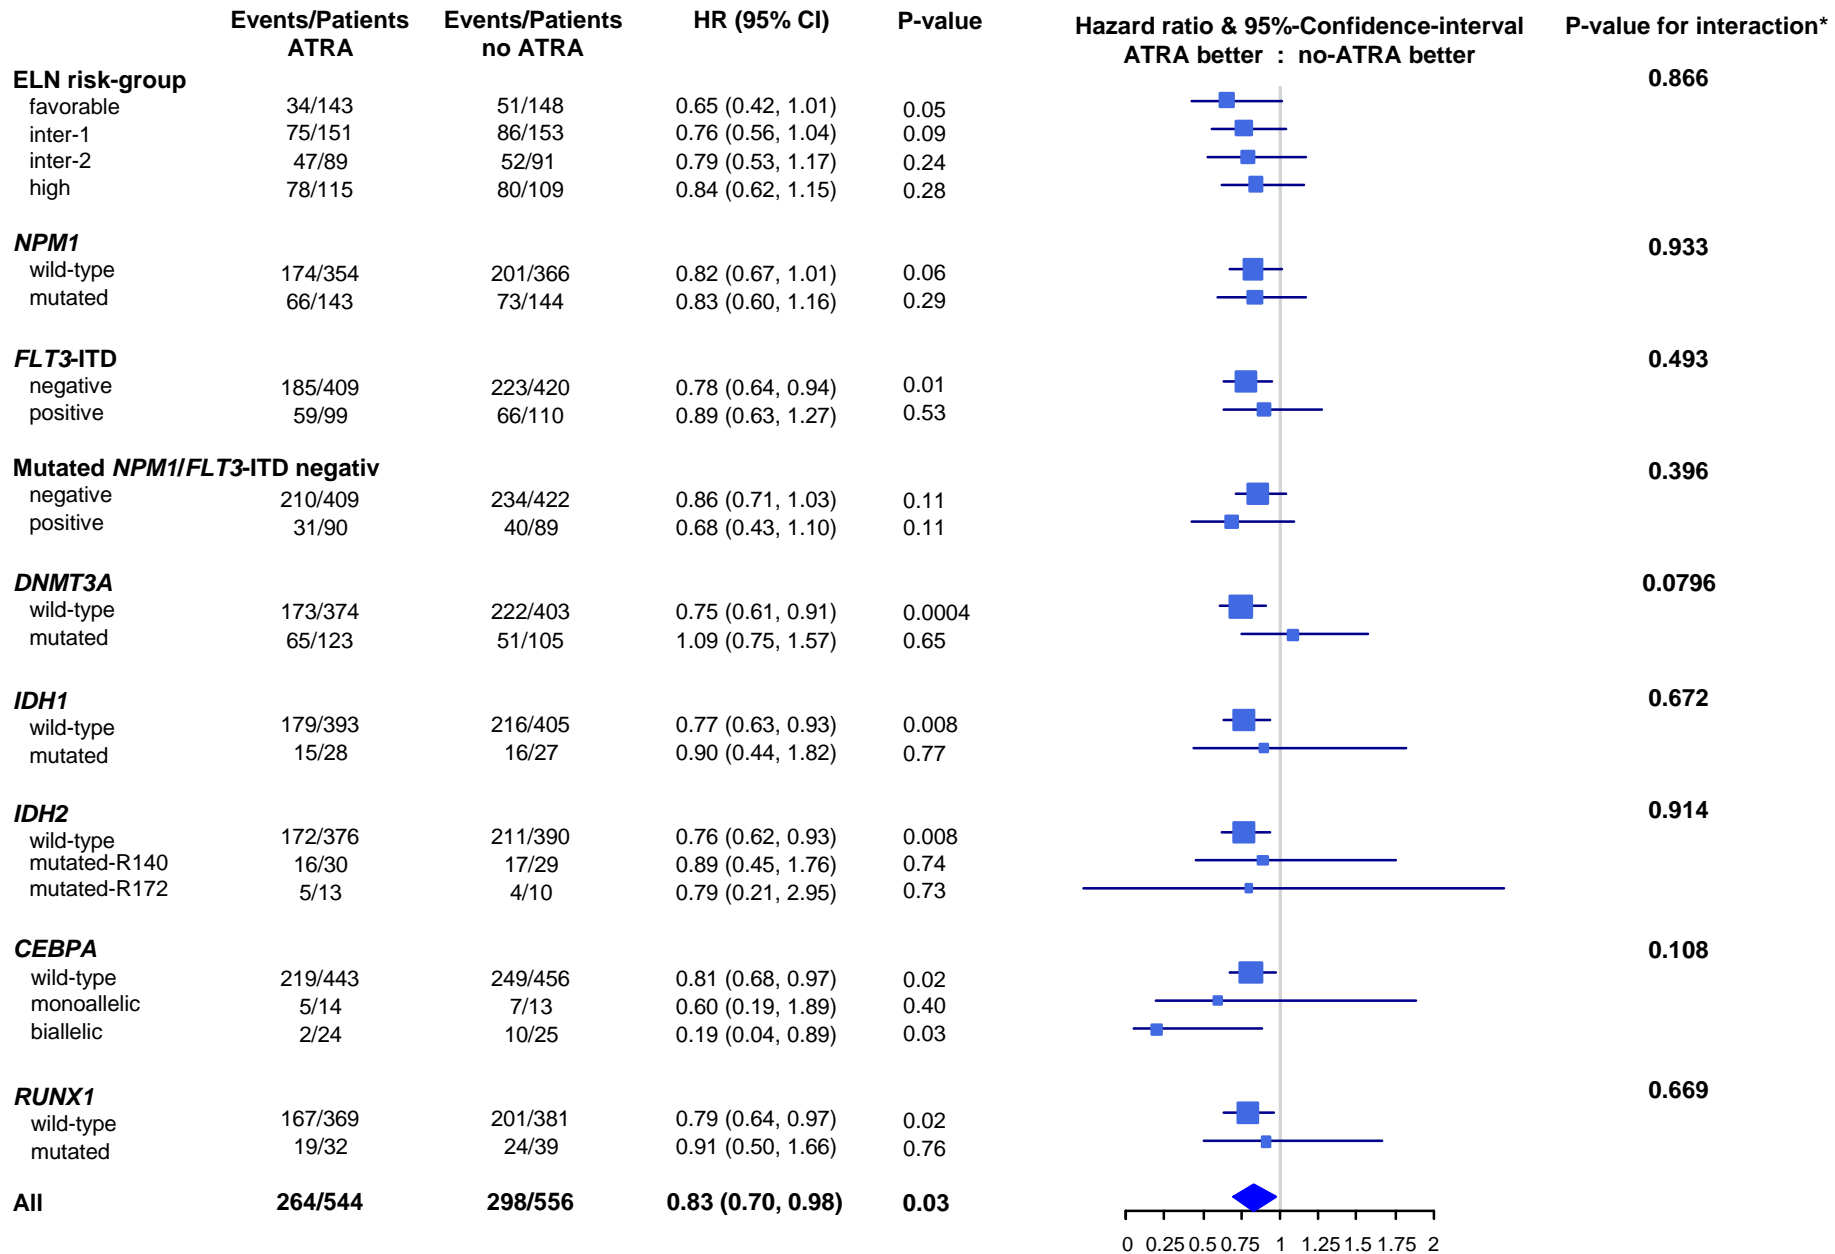

Supplement: 277_2016_2810_MOESM3_ESM.pdf [file 277_2016_2810_MOESM3_ESM.pdf]
