# Supplementary material for: All-trans retinoic acid as adjunct to intensive treatment in younger adult patients with acute myeloid leukemia: results of the randomized AMLSG 07-04 study
Source: PubMed Central journal article supplement (PMC5093206; doi:10.1007/s00277-016-2810-z), 2016-10-03
Supplement: 277_2016_2810_MOESM4_ESM.pdf [file 277_2016_2810_MOESM4_ESM.pdf]

**Supplementary Table 1.a****Logistic regression model with the endpoint CR after double induction therapy analysed on an intention-to-treat basis**

|                               | OR   | 95%-CI      | p-value |
|-------------------------------|------|-------------|---------|
| Genetic risk according to ELN |      |             |         |
| Favorable-risk'               | 3.61 | 2.16 – 6.02 | <0.0001 |
| Intermediate-2'               | 0.78 | 0.51-1.20   | 0.26    |
| Adverse-risk'                 | 0.40 | 0.28 - 0.59 | <0.0001 |
| Mutated <i>DNMT3A</i>         | 1.64 | 1.09 - 2.47 | 0.018   |
| s/t-AML                       | 0.60 | 0.40 - 0.89 | 0.012   |
| Male gender                   | 0.70 | 0.52 - 0.94 | 0.018   |
| Age (diff. of 10 yrs)         | 0.85 | 0.74 - 0.98 | 0.021   |
| WBC (Median-dichotomized)*    | 0.72 | 0.53 - 0.98 | 0.035   |
| Valproic acid                 | 0.67 | 0.46 – 0.98 | 0.040   |
| ATRA                          | 0.99 | 0.74 - 1.33 | 0.96    |

Variables excluded after limited backward selection in the order of their exclusion: *RUNX1* mutational status (p=0.82), *FLT3*-TKD (p=0.61), *ASXL1* mutational status (p=0.30), *IDH2* mutational status (p=0.26), *IDH1* mutational status (p=0.09), VPA (p=0.06). \*the median WBC of the whole cohort was 12.7 G/l.

**Supplementary Table 1.b****Logistic regression model with the endpoint CR after double induction therapy analysed on a per-protocol basis**

|                               | OR   | 95%-CI      | p-value |
|-------------------------------|------|-------------|---------|
| Genetic risk according to ELN |      |             |         |
| Favorable-risk'               | 3.52 | 2.10 - 5.89 | <0.0001 |
| intermediate-2'               | 0.76 | 0.50 – 1.16 | 0.21    |
| Adverse-risk'                 | 0.41 | 0.28 - 0.61 | <0.0001 |
| Mutated <i>DNMT3A</i>         | 1.50 | 1.01 - 2.24 | 0.045   |
| s/t-AML                       | 0.62 | 0.42 - 0.94 | 0.023   |
| Male gender                   | 0.72 | 0.53 - 0.96 | 0.026   |
| Age (diff. of 10 yrs)         | 0.87 | 0.74 - 0.99 | 0.043   |
| Valproic acid                 | 0.68 | 0.46 – 0.99 | 0.045   |
| ATRA                          | 1.31 | 0.98 - 1.76 | 0.07    |

Variables excluded after limited backward selection in the order of their exclusion: *RUNX1* mutational status (p=0.81), *FLT3*-TKD (p=0.63), *IDH2* mutational status (p=0.32), *ASXL1* mutational status (p=0.29), *IDH1* mutational status (p=0.11), WBC (p=0.06). \*the median WBC of the whole cohort was 12.7 G/l.

'reference group intermediate-1
