# Supplementary material for: All-trans retinoic acid as adjunct to intensive treatment in younger adult patients with acute myeloid leukemia: results of the randomized AMLSG 07-04 study
Source: Springer Nature journal article supplement (doi:10.1007/s00277-016-2810-z), 2016-10-03

# Supplementary Figure 2: Event-free Survival, per-protocol analysis

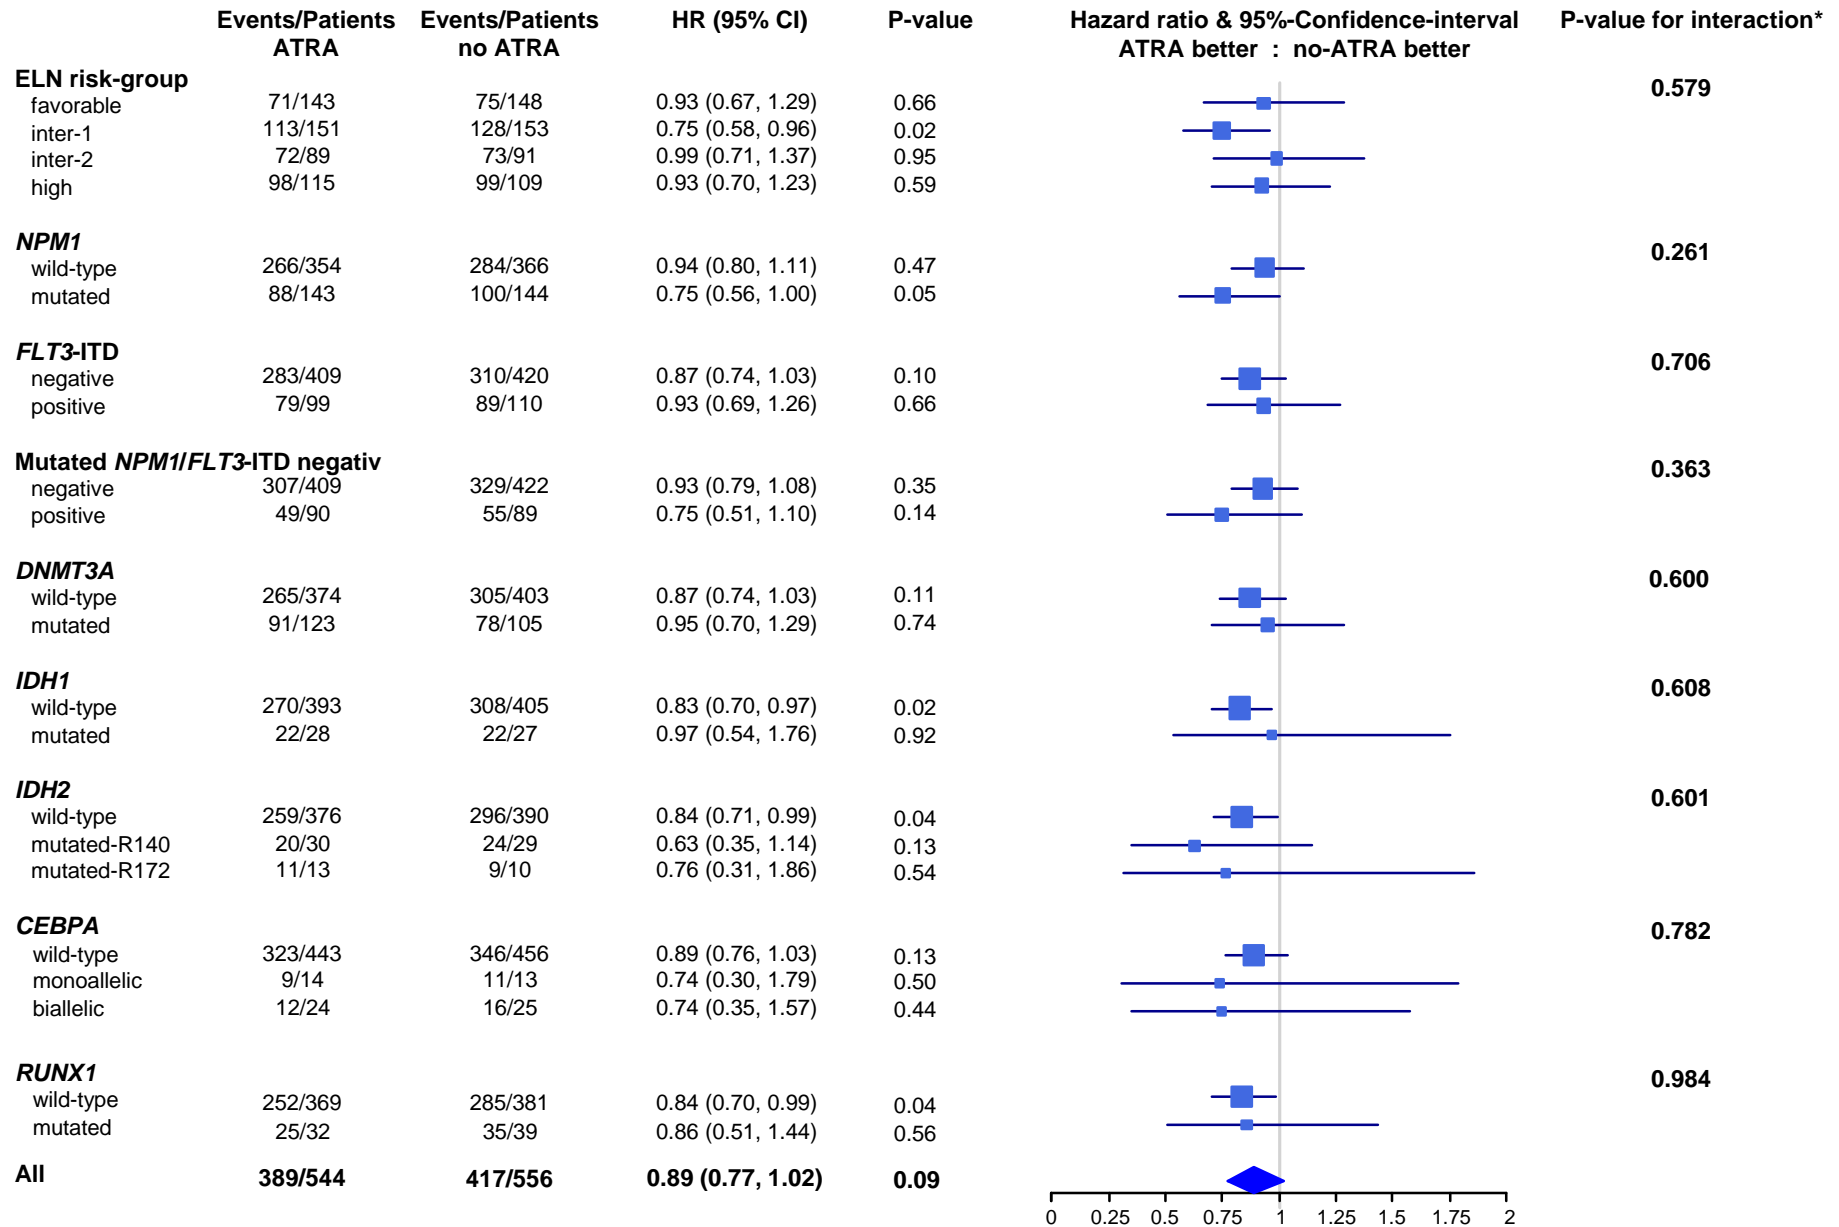

Supplement: MOESM2 [file 10806666]
