# Supplementary material for: All-trans retinoic acid as adjunct to intensive treatment in younger adult patients with acute myeloid leukemia: results of the randomized AMLSG 07-04 study
Source: Springer Nature journal article supplement (doi:10.1007/s00277-016-2810-z), 2016-10-03
Supplement: MOESM5 [file 10806666]

**Supplementary Table 2:****Adverse events grade 3/4 occurring during first induction therapy according to treatment with or without ATRA**

|                             | STANDARD<br>n=553<br>No. (%) | ATRA<br>n=538<br>No. (%) | p-value |
|-----------------------------|------------------------------|--------------------------|---------|
| Allergic reaction           | 4 (1)                        | 12 (2)                   | 0.04    |
| Cardiac                     | 22 (4)                       | 9 (1.5)                  | 0.03    |
| Coagulation                 | 8 (1.5)                      | 8 (1.5)                  | 0.99    |
| Constitutional symptoms     | 4 (1)                        | 7 (1.5)                  | 0.38    |
| Dermatology/skin            | 14 (2.5)                     | 20 (4)                   | 0.30    |
| Gastrointestinal            | 63 (11.5)                    | 81 (15)                  | 0.09    |
| Hemorrhage/bleeding         | 14 (2.5)                     | 15 (3)                   | 0.85    |
| Hepatobiliary/pancreas      | 5 (1)                        | 7 (1.5)                  | 0.57    |
| Metabolic/laboratory        | 66 (12%)                     | 67 (12.5)                | 0.85    |
| Neurology                   | 11 (2)                       | 13 (2.5)                 | 0.68    |
| Pain                        | 6 (1)                        | 6 (1)                    | 0.99    |
| Pulmonary/upper respiratory | 19 (3.5)                     | 24 (4.5)                 | 0.44    |
| Renal/genitourinary         | 8 (1.5)                      | 4 (1)                    | 0.38    |
| Vascular                    | 8 (1.5)                      | 7 (1.5)                  | 0.99    |
| Infections                  | 329 (59.5)                   | 341 (63.5)               | 0.19    |
| Other                       | 13 (2.5)                     | 10 (2)                   | 0.67    |
